# Supplementary material
Source: MDPI journal article supplement (https://www.mdpi.com/2073-4433/12/12/1564)
Supplement: s1 [file s1]

# Supplementary Materials: Quantification and Characterization of Metals in Ultrafine Road Dust Particles

Suzanne Beauchemin<sup>1,\*</sup>, Christine Levesque<sup>1</sup>, Clare L.S. Wiseman<sup>2,3,4</sup>, Pat E. Rasmussen<sup>1</sup> and <sup>5</sup>

**Table S1.** QA/QC for ICP measurements of certified reference materials; mean concentrations and standard deviation (sd) obtained using ICP-MS unless indicated otherwise. Percent recoveries are calculated based on certified values unless indicated otherwise. All concentrations are in mg kg<sup>-1</sup>.

|                        | NIST 1648 (n=12 <sup>d</sup> ) |        |       |                 | NIST 2557 (n=15 <sup>d</sup> ) |       |                  | NIST 2584 (n=9 <sup>d</sup> ) |       |                  | NIST 2711 (n=15 <sup>d</sup> ) |       |                  | BCR-723 (n=15 <sup>d</sup> ) |       |                  |
|------------------------|--------------------------------|--------|-------|-----------------|--------------------------------|-------|------------------|-------------------------------|-------|------------------|--------------------------------|-------|------------------|------------------------------|-------|------------------|
|                        | LOD <sup>c</sup>               | mean   | sd    | % recovery      | mean                           | sd    | % recovery       | mean                          | sd    | % recovery       | mean                           | sd    | % recovery       | mean                         | sd    | % recovery       |
| Aluminum <sup>a</sup>  | 7.32                           | 32784  | 1219  | 96              | 183228                         | 24382 | 92 <sup>b</sup>  | 22212                         | 1520  | 96               | 62268                          | 5050  | 95               | 35304                        | 3562  | 94 <sup>b</sup>  |
| Antimony               | 0.86                           | 32.5   | 3.88  | 72 <sup>b</sup> | 3.25                           | 2.42  | NA               | 11.2                          | 2.02  | 80 <sup>b</sup>  | 15.1                           | 3.54  | 78               | 21.8                         | 3.93  | 77 <sup>b</sup>  |
| Arsenic                | 0.07                           | 83.6   | 6.02  | 73              | 12.5                           | 1.83  | NA               | 16.1                          | 1.66  | 92               | 90.5                           | 11.0  | 86               | 11.5                         | 1.47  | NA               |
| Barium                 | 0.27                           | 730    | 56.9  | 99 <sup>b</sup> | 2756                           | 377   | 95 <sup>b</sup>  | 1396                          | 110   | 107 <sup>b</sup> | 706                            | 67.6  | 97               | 446                          | 52.2  | 97 <sup>b</sup>  |
| Beryllium              | 0.01                           | 1.87   | 0.19  | NA              | 0.61                           | 0.05  | NA               | 0.74                          | 0.04  | 106 <sup>b</sup> | 2.20                           | 0.17  | NA               | 1.26                         | 0.12  | NA               |
| Cadmium                | 0.01                           | 61.3   | 5.42  | 82              | 1.34                           | 0.18  | 3 <sup>b</sup>   | 7.74                          | 1.11  | 77               | 34.3                           | 3.37  | 82               | 1.80                         | 0.26  | 72 <sup>b</sup>  |
| Chromium               | 1.64                           | 78.4   | 8.53  | 19              | 425                            | 132   | NA               | 131                           | 44.0  | 97               | 37.7                           | 7.70  | 80               | 190                          | 31.8  | 43 <sup>b</sup>  |
| Cobalt                 | 0.09                           | 16.1   | 2.24  | 90 <sup>b</sup> | 35.9                           | 5.07  | NA               | 13.6                          | 0.90  | 136 <sup>b</sup> | 11.4                           | 1.09  | 114 <sup>b</sup> | 35.5                         | 3.41  | 119 <sup>b</sup> |
| Copper <sup>a</sup>    | 0.85                           | 598    | 29.3  | 98              | 128                            | 16.0  | NA               | 324                           | 92.0  | 101 <sup>b</sup> | 138                            | 41.2  | 121              | 289                          | 66.0  | NA               |
| Iron <sup>a</sup>      | 14.0                           | 37105  | 1559  | 95              | 13334                          | 2035  | 89 <sup>b</sup>  | 14029                         | 881   | 86               | 27460                          | 2646  | 95               | 31407                        | 3322  | 95 <sup>b</sup>  |
| Lanthanum              | 0.01                           | 29.1   | 1.73  | 69 <sup>b</sup> | 687                            | 89.3  | 98 <sup>b</sup>  | 13.3                          | 2.86  | 70               | 29.5                           | 4.32  | 74 <sup>b</sup>  | 14.0                         | 2.03  | NA               |
| Lead                   | 0.05                           | 6188   | 349   | 94              | 13134                          | 1314  | 94               | 9349                          | 696   | 96               | 1127                           | 107   | 97               | 827                          | 85.0  | 95 <sup>b</sup>  |
| Magnesium <sup>a</sup> | 3.04                           | 5615   | 3402  | 70 <sup>b</sup> | 59568                          | 16835 | 99 <sup>b</sup>  | 14158                         | 1106  | 89               | 7972                           | 4263  | 76               | 30847                        | 3542  | NA               |
| Manganese <sup>a</sup> | 0.19                           | 783    | 60.3  | 100             | 709                            | 85.6  | NA               | 334                           | 24.8  | 90 <sup>b</sup>  | 630                            | 75.9  | 99               | 1274                         | 228   | 100 <sup>b</sup> |
| Molybdenum             | 0.43                           | 11.9   | 1.03  | NA              | 18.8                           | 12.6  | NA               | 6.50                          | 5.57  | 118 <sup>b</sup> | 1.16                           | 0.42  | 73 <sup>b</sup>  | 37.7                         | 5.29  | 94 <sup>b</sup>  |
| Nickel                 | 0.22                           | 58.9   | 2.55  | 72              | 4107                           | 368   | 82 <sup>b</sup>  | 97.7                          | 48.5  | 109 <sup>b</sup> | 20.9                           | 4.64  | 102              | 171                          | 20.1  | 100 <sup>b</sup> |
| Rubidium               | 0.03                           | 33.5   | 1.49  | 64 <sup>b</sup> | 7.28                           | 0.98  | NA               | 29.9                          | 2.48  | 91 <sup>b</sup>  | 106                            | 9.13  | 96 <sup>b</sup>  | 65.3                         | 5.70  | 87 <sup>b</sup>  |
| Silicon <sup>a</sup>   | 48.6                           | 131547 | 26633 | NA              | 172773                         | 21076 | 96 <sup>b</sup>  | 75757                         | 13187 | 71 <sup>b</sup>  | 277787                         | 79015 | 91               | 124420                       | 32328 | NA               |
| Strontium              | 0.60                           | 172    | 6.16  | NA              | 71.3                           | 6.66  | NA               | 159                           | 12.4  | 99 <sup>b</sup>  | 247                            | 17.7  | 101              | 241                          | 24.2  | 95 <sup>b</sup>  |
| Sulfur <sup>a</sup>    | 54.2                           | 46676  | 2916  | 93 <sup>b</sup> | 1479                           | 202   | NA               | 15771                         | 1133  | NA               | 419                            | 102   | 100              | 30361                        | 13084 | NA               |
| Thallium               | 0.01                           | 2.21   | 0.05  | NA              | 0.03                           | 0.01  | NA               | 0.30                          | 0.02  | NA               | 2.37                           | 0.19  | 96               | 0.34                         | 0.03  | NA               |
| Titanium <sup>a</sup>  | 1.57                           | 2532   | 183   | 63 <sup>b</sup> | 2455                           | 268   | NA               | 1319                          | 262   | 31               | 1823                           | 277   | 60               | 1466                         | 282   | 57 <sup>b</sup>  |
| Uranium                | 0.01                           | 5      | 0.31  | 94              | 1.17                           | 0.12  | NA               | 1.27                          | 0.16  | 79 <sup>b</sup>  | 2.13                           | 0.35  | 82 <sup>b</sup>  | 1.49                         | 0.17  | NA               |
| Vanadium               | 0.05                           | 102    | 9.36  | 80              | 61.4                           | 5.08  | NA               | 32.7                          | 2.64  | 96 <sup>b</sup>  | 76.8                           | 7.16  | 94               | 72.9                         | 7.79  | 97 <sup>b</sup>  |
| Zinc <sup>a</sup>      | 3.46                           | 4434   | 313   | 93              | 1202                           | 149   | 120 <sup>b</sup> | 2338                          | 192   | 91               | 346                            | 45.1  | 99               | 1669                         | 309   | 101 <sup>b</sup> |

<sup>a</sup> Measured concentrations obtained by ICP-OES

<sup>b</sup> % recovery calculated based on the indicative values. NA: no certified or indicative value available

<sup>c</sup> LOD = Limits of detection calculated as 3 times the standard deviation of 21 procedural blanks for ICP-MS and 27 for ICP-OES

<sup>d</sup> Max number of replicates with the following exceptions: (i) Cu n=6 for all CRMs; (ii) Si n=9 for NIST 2557, NIST 2711 and BCR; n=6 for NIST 1648 and n=3 for NIST 2584; (iii) Ti and Zn n=13 for NIST 2557, NIST 2711 and BCR; n=7 for NIST 2584 and n=10 for NIST 164

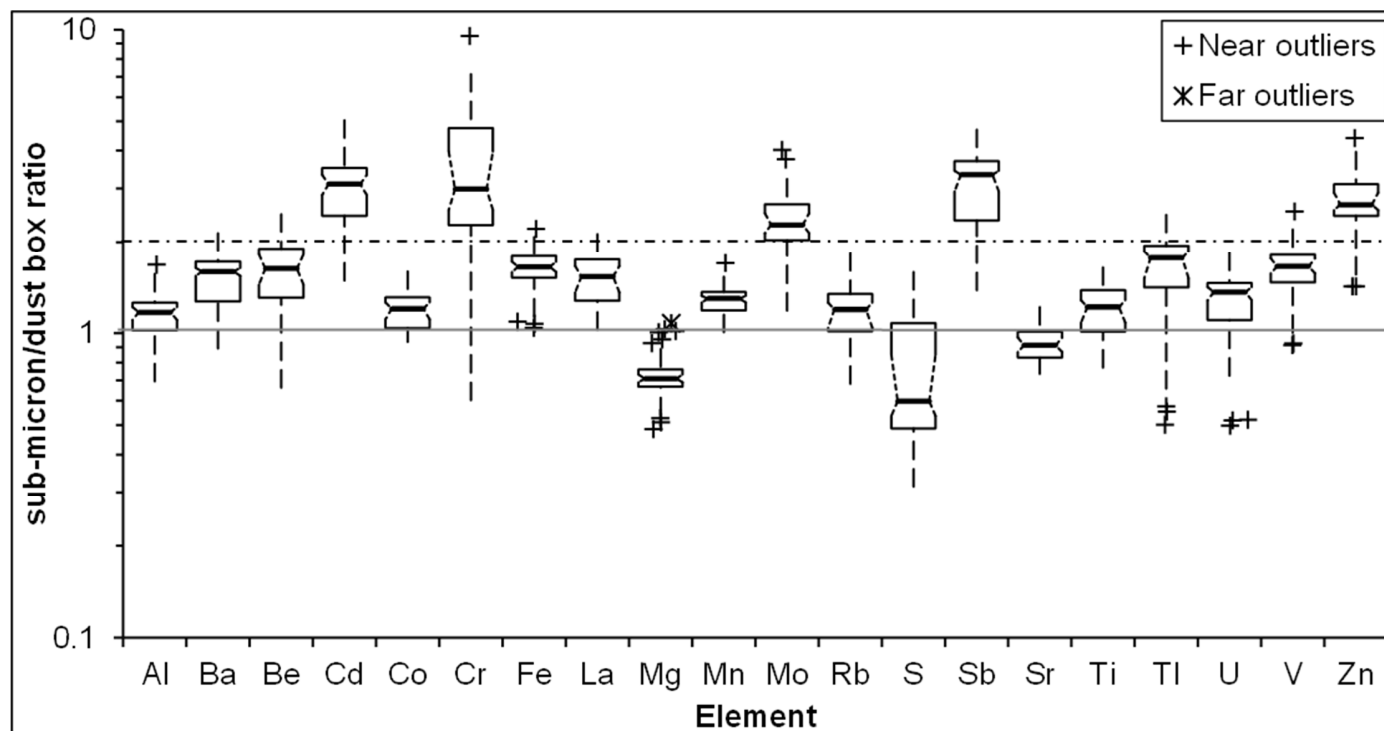

**Figure S1.** Ratios of element concentrations in the aerosolized sub-micron fractions compared to the dust box considering all six road dust samples (sub-micron/dust box ratio); each box plot shows the median within the 25<sup>th</sup> and 75<sup>th</sup> percentile box, dispersion extending 1.5\*IQR from each quartile, as well as near (> 1.5 IQR) and far (> 3 IQR) outliers. The 95% confidence interval for the median is plotted as a notch on the box. Plain and dotted lines at sub/dust box ratio = 1 or 2 respectively are visual guidelines. Cu, Sn, Pb, Ni, Bi and As were not included in the analysis due to potential cross-contamination from the bronze beads. Ag, Bi, Zr, B, Ce, Se and Si were not included because > 50% of the values in the sub-micron and nano fractions were < LOD.

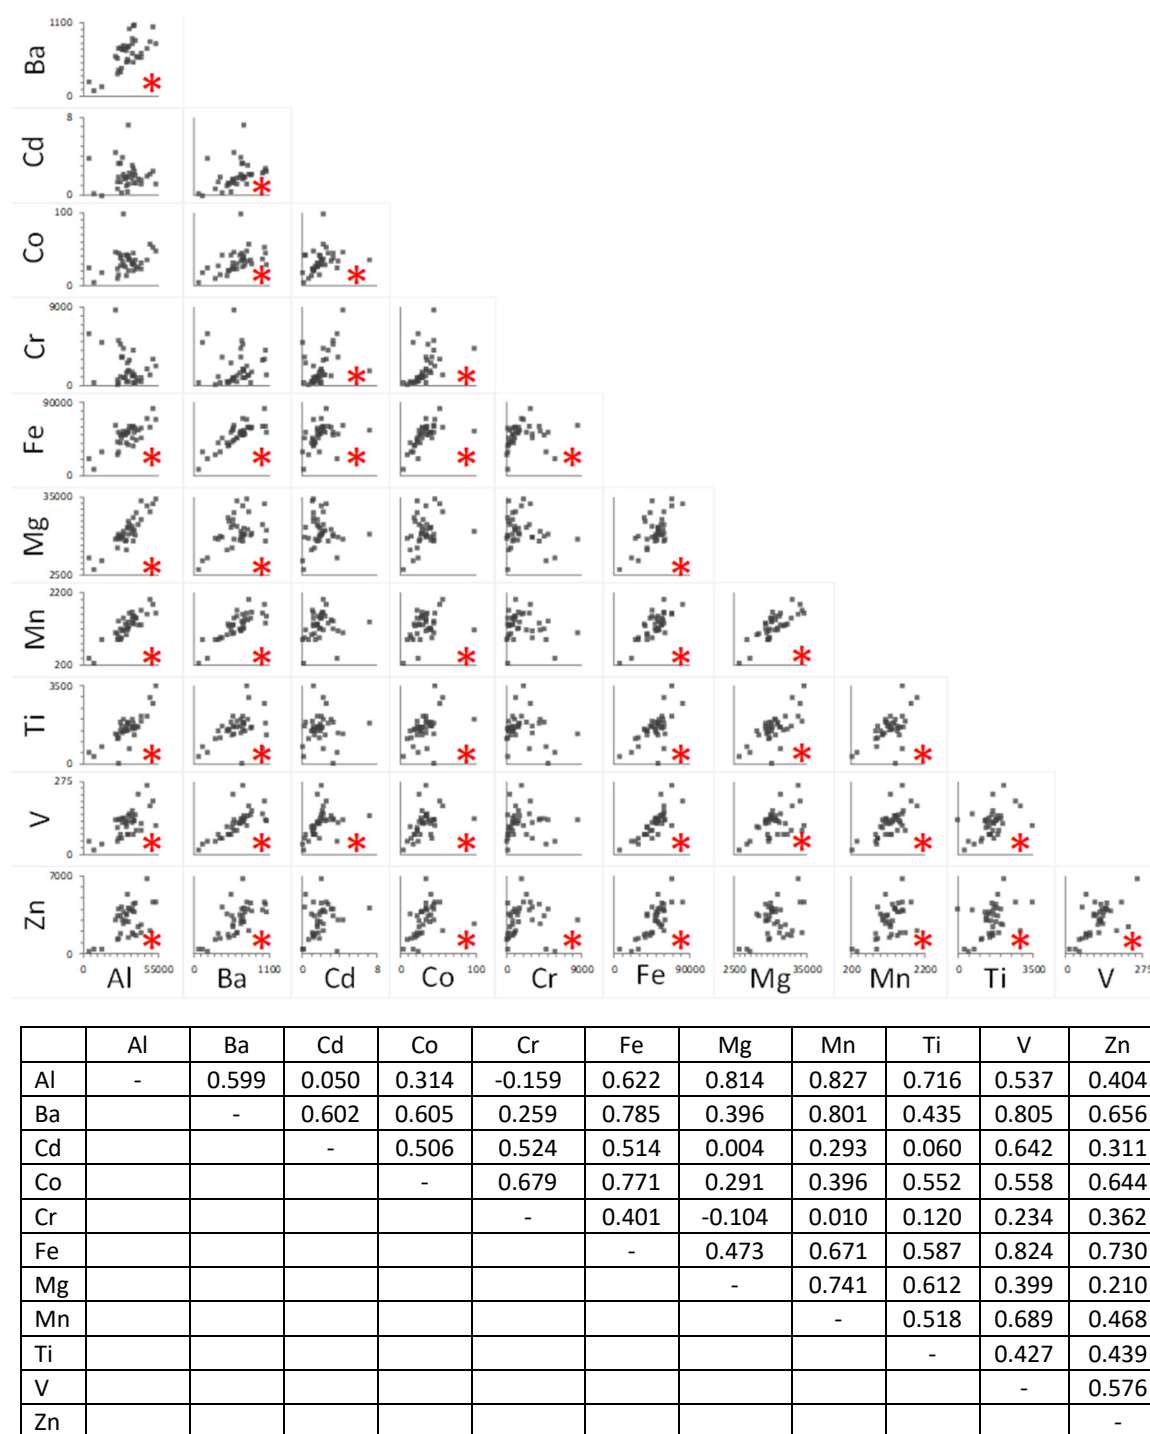

**Figure S2.** Scatterplot matrix showing the correlation between concentrations of various key elements in the nano-scale dust fractions (n=35); “\*” indicate significant Spearman’s correlations at a 5% significance level (2-sided Fisher’s test); correlation coefficients reported in the accompanying table.
